# Supplementary material for: Hilfsmittelgestützte Versorgung von Dekubitus
Source: Springer Nature journal article supplement (doi:10.1007/s00058-023-3056-5), 2023-04-01

## Abbildung 2

### zum Beitrag „Hilfsmittelgestützte Versorgung von Dekubitus“ von Norbert Kamps

Heilberufe (75) 4/2023, S. 18-20

**Abb. 2** Innovative Dekubithilfsmittel greifen die verschiedenen Wirkprinzipien sowie Arbeitsweisen auf und kombinieren diese. Dabei können die Kombinationen unterschiedlich ausgeprägt sein. Welche Kombination sinnvoll ist, ergibt sich stets aus den Anforderungen des Einzelfalls

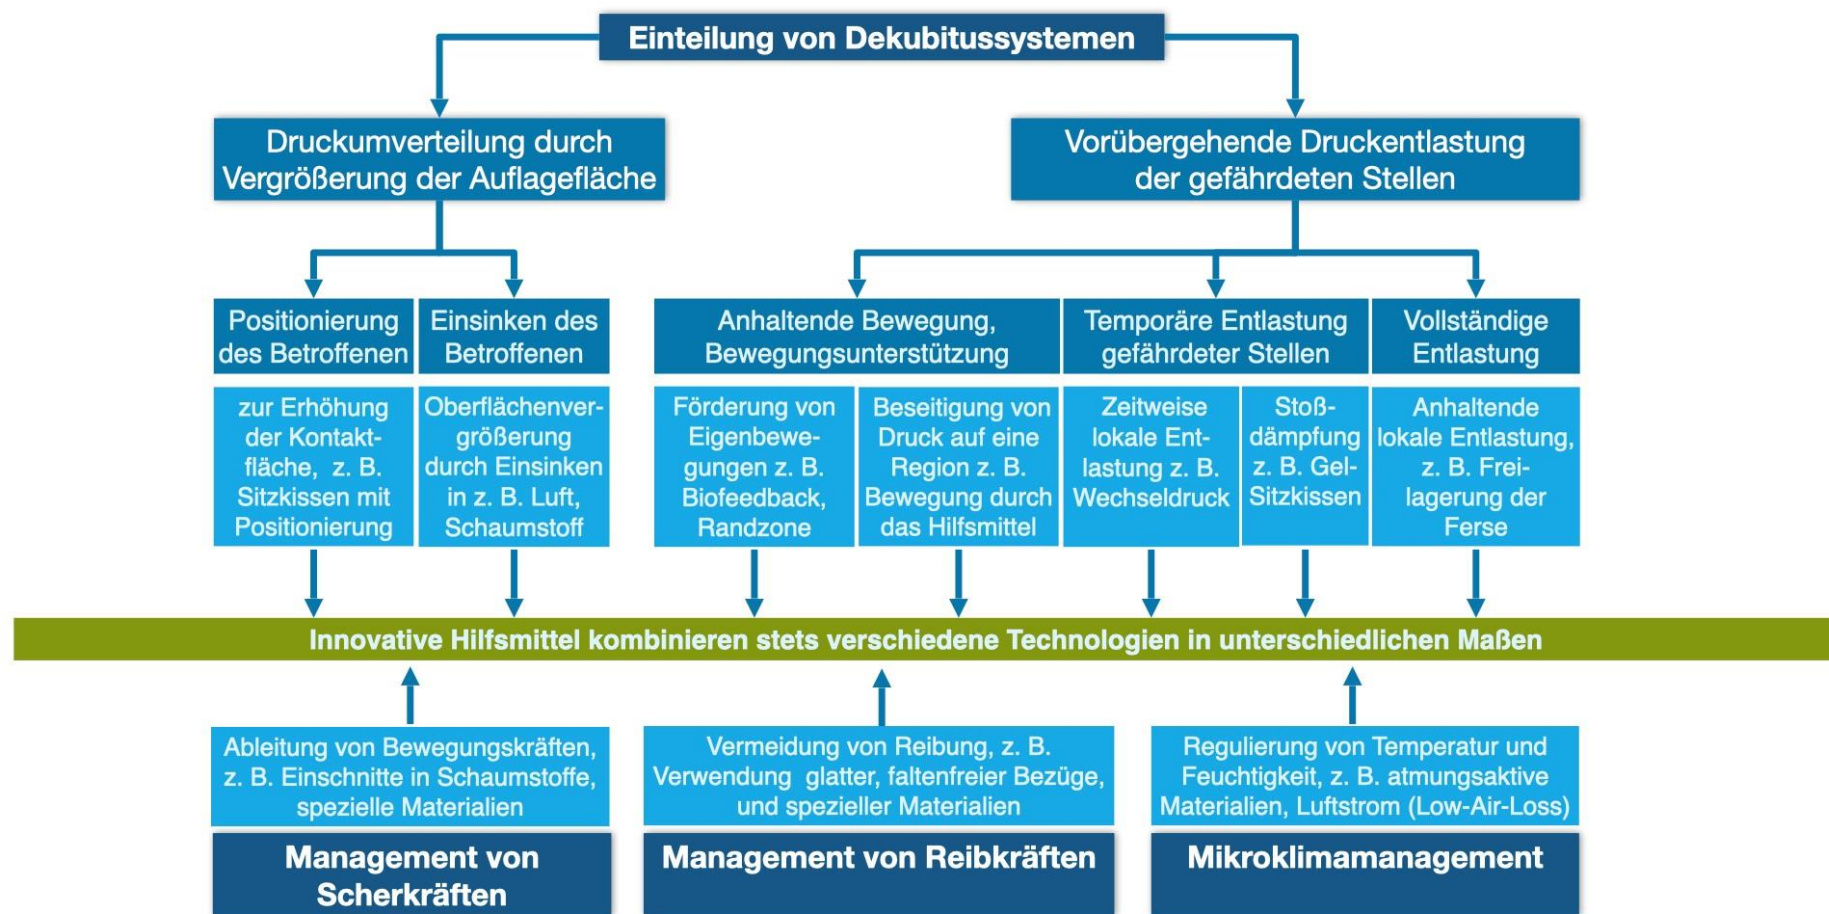

Supplement: MOESM1 [file 25200490]
